# Supplementary material
Source: publisher figshare collection journal article supplement (https://gsajournals.figshare.com/ndownloader/files/26037728)
Supplement: Supplementary file 1 [file 26037728]

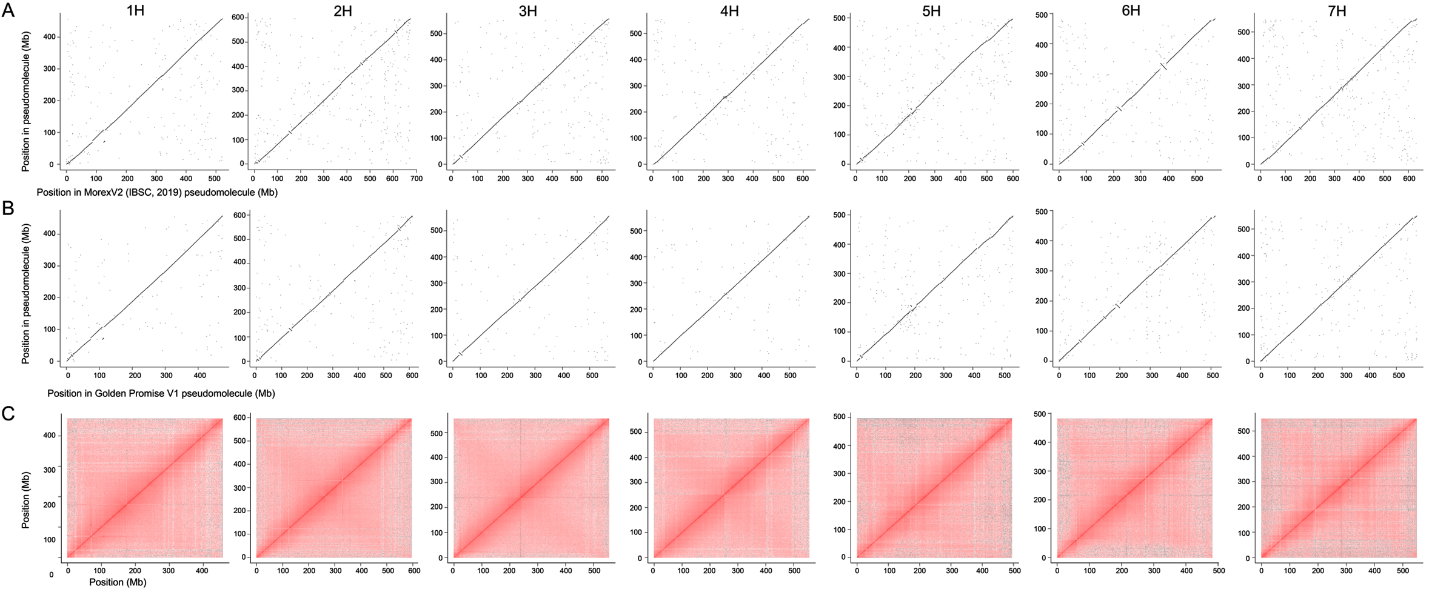


**Figure S1**. Collinearity of AAC Synergy V1, Morex V2 and Golden Promise V1 assemblies. A. Dot plots showing the alignments between the chromosomal pseudomolecules of the AAC Synergy V1 and Morex V2 assemblies. B. Dot plots showing the alignments between the chromosomal pseudomolecules of the AAC Synergy V1 and Golden Promise V1 assemblies. C. Intra-chromosomal Hi-C contact matrices of the AAC Synergy V1 assembly.
